# Supplementary material
Source: PubMed Central journal article supplement (PMC2902989)

A

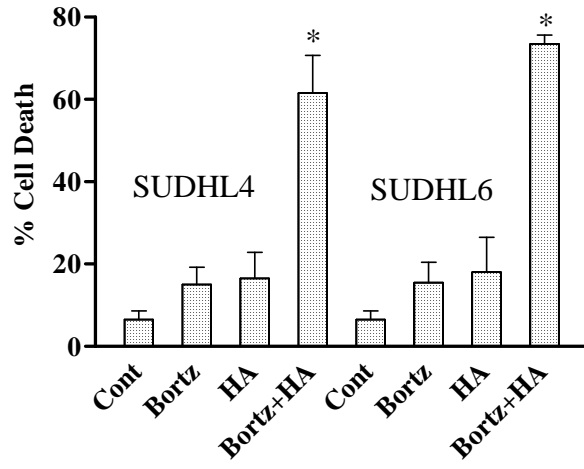

B

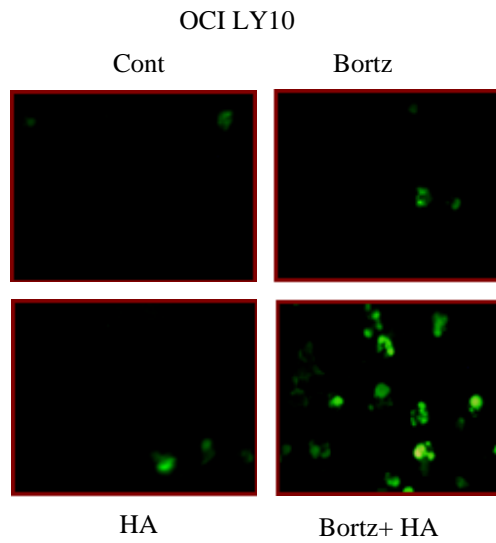

C

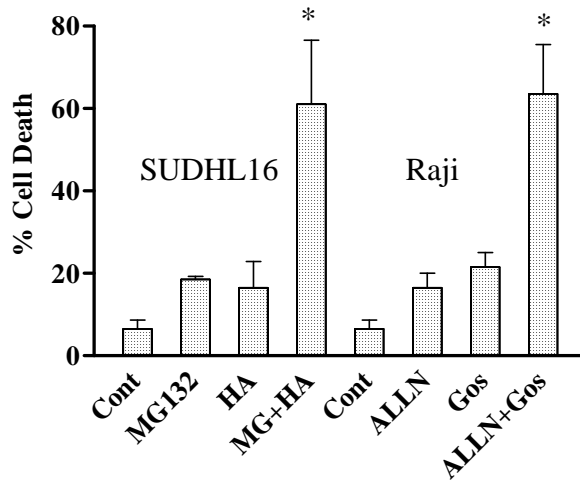

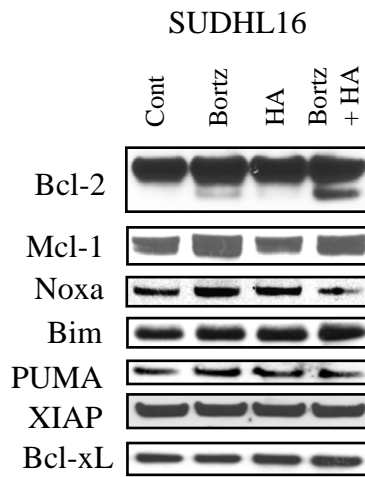

Suppl Fig. 2

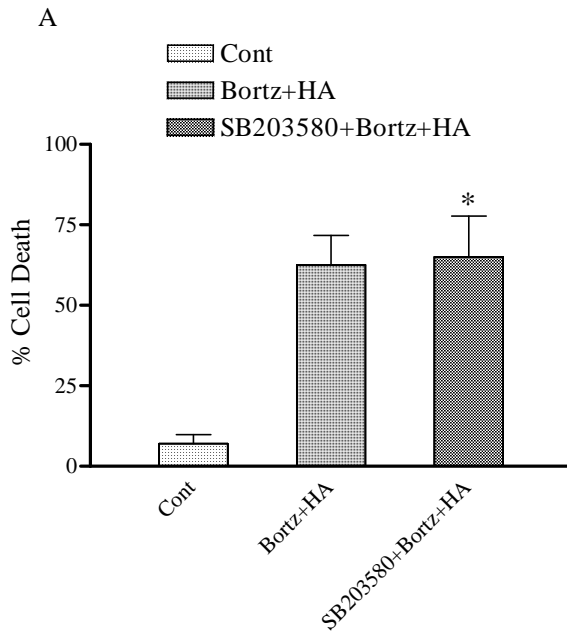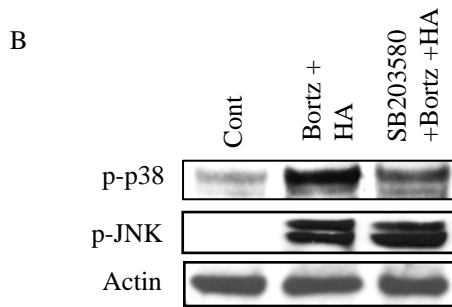

Supplement: NIHMS209958-supplement-Supplementary_Data.pdf [file NIHMS209958-supplement-Supplementary_Data.pdf]
